# Supplementary material for: Intensity and Dynamics of Anti-SARS-CoV-2 Immune Responses after BNT162b2 mRNA Vaccination: Implications for Public Health Vaccination Strategies
Source: MDPI journal article supplement (doi:10.3390/vaccines10020316), 2022-02-17
Supplement: s1 [file s1]

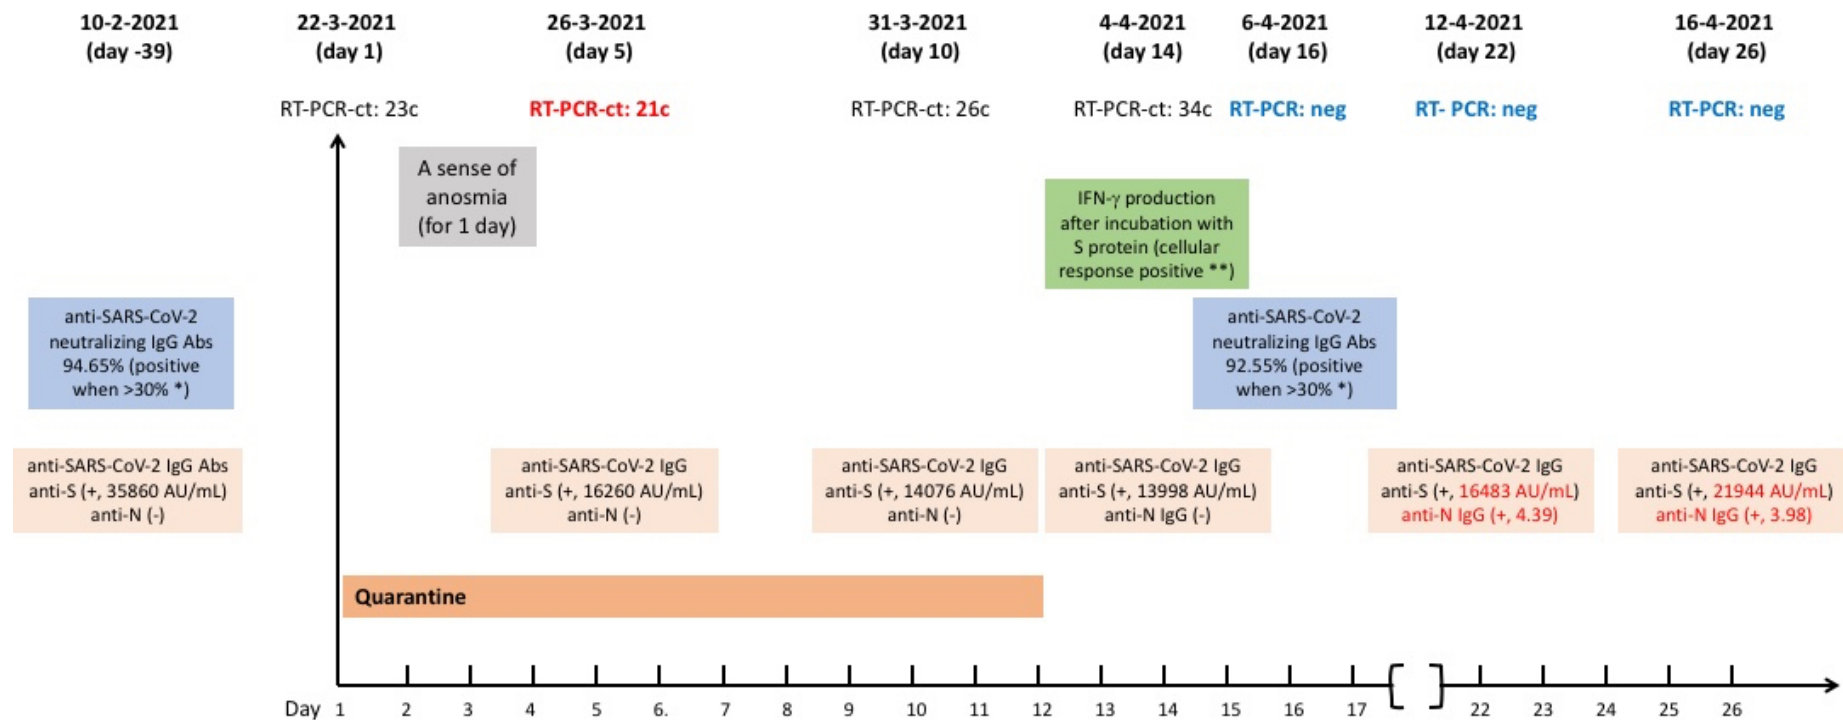

Figure S1: Clinical and laboratory findings of COVID-19 in a 56-year-old female (No #101, VI101) infected post-vaccination. She displayed a medical history of rheumatoid arthritis the last 13 years, diabetes mellitus type 2, hypothyroidism and obesity (body mass index: 38.92). After confirmed COVID-19 infection in her son and 2 months after completion of her vaccination schedule, she underwent an RT-PCR for SARS-CoV-2 via pharyngeal swab and she was found positive. The laboratory analyses performed are presented in detail in Figure, while she complained only about a sense of anosmia for one day. She exhibited RT-PCR negativity on day 16 after diagnosis, while on day 22 she displayed for the first-time anti-N anti-SARS-CoV-2 IgG antibodies, along with an increase of anti-S anti-SARS-CoV-2 IgG antibodies in her serum; this pattern remained similar thereafter, that was indicative of an immune response against the virus. Additional laboratory studies were also performed, revealing the presence of neutralizing anti-SARS-CoV-2 antibodies (using the “cPass™ SARS-CoV-2 Neutralization Antibody Detection Kit”, Genscript, Leiden, the Netherlands [\*]), the detection of adequate anti-SARS-CoV-2 cellular responses (detected as described in Methods [\*\*]) and the B.1.1.7 lineage of SARS-CoV-2 (namely the United Kingdom/Kent variant)

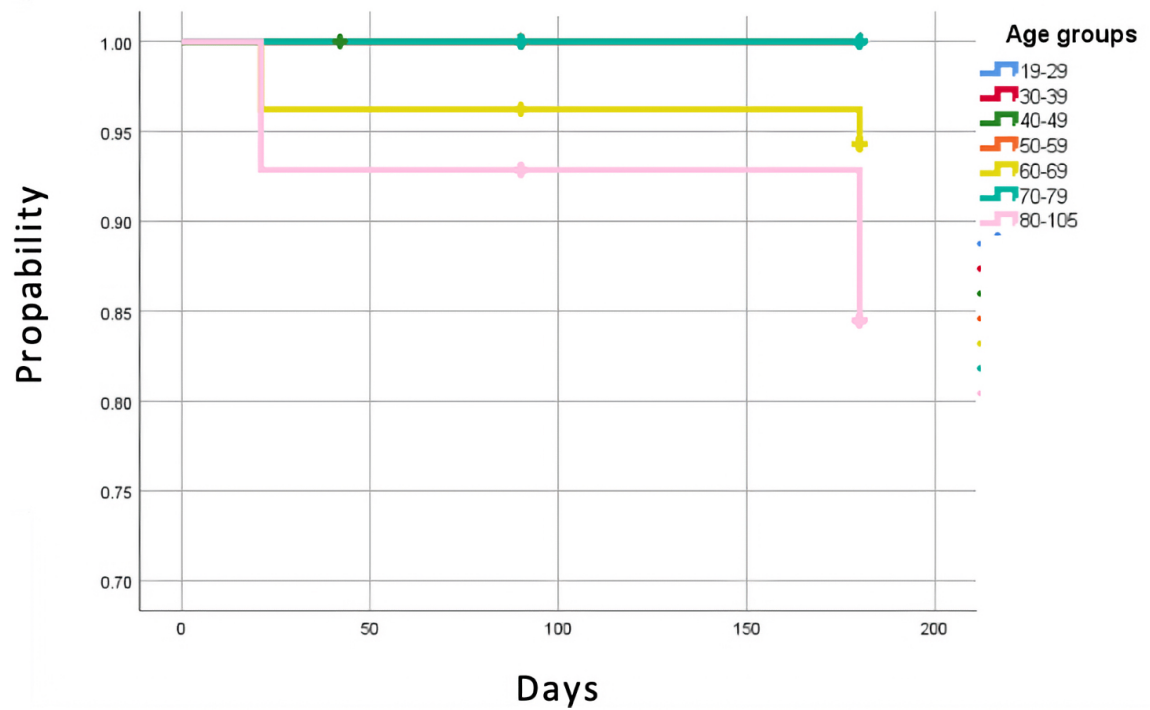

Figure S2: Kaplan-Meier curve of IgG anti-SARS-CoV-2 antibody loss after vaccination according to the age group of enrolled participants

**Table S1.** Intensity of anti-SARS-CoV-2 IgG responses on day 21 after the first dose of BNT162b2 vaccination

| Parameter                                    | N, median IgG levels (mg/dL) (IQR)                      | <i>p</i> , univariate analysis | <i>p</i> , multivariate analysis                                               | Coefficient, 95% CI          |
|----------------------------------------------|---------------------------------------------------------|--------------------------------|--------------------------------------------------------------------------------|------------------------------|
| Sex                                          | Male: 178, 397.1 (1448.0)<br>Female: 286, 444.7 (840.6) | 0.525                          | -                                                                              |                              |
| Age (years)                                  | $\rho = -0.453$                                         | <b>&lt;0.001</b>               | <b>&lt;0.001</b>                                                               | -19.60,<br>-26.36 - -12.85   |
| Hypertension                                 | Yes: 134, 190.9 (640.6)<br>No: 194, 536.3 (1991.5)      | <b>&lt;0.001</b>               | 0.570                                                                          | 71.59,<br>-176.09 - 319.28   |
| Diabetes mellitus                            | Yes: 54, 209.1 (550.1)<br>No: 410, 459.7, (951.1)       | <b>0.001</b>                   | 0.832                                                                          | -32.36,<br>-332.29 - 267.57  |
| Dyslipidemia                                 | Yes: 83, 201.9 (477.5)<br>No: 381, 499.3 (1030.5)       | <b>&lt;0.001</b>               | 0.577                                                                          | -69.4,<br>-313.72 - 174.92   |
| Chronic heart disease                        | Yes: 60, 193.1, (742.8)<br>No: 404, 469.3 (934.3)       | <b>0.003</b>                   | 0.449                                                                          | -113.24,<br>-407.06 - 180.59 |
| Stroke/TIA                                   | Yes: 22, 178.0 (527.8)<br>No: 442, 440.4 (942.3)        | <b>0.014</b>                   | 0.432                                                                          | -171.84,<br>-601.05 - 257.37 |
| Venous/arterial thrombosis                   | Yes: 10, 386.5 (1070.4)<br>No: 454, 426.4 (936.6)       | 0.843                          | -                                                                              |                              |
| Chronic respiratory disease                  | Yes: 24, 208.8 (1050.7)<br>No: 440, 439.4 (932.6)       | 0.167                          | 0.667                                                                          | 87.74,<br>-312.53 - 488.02   |
| Autoimmune/ autoimmune-inflammatory diseases | Yes: 38, 341.4 (669.2)<br>No: 426, 439.4 (966.9)        | 0.655                          | -                                                                              |                              |
| Thyroid disease                              | Yes: 56, 504.7 (836.0)<br>No: 408, 415.8 (953.5)        | 0.450                          | -                                                                              |                              |
| Chronic liver disease                        | Yes: 5, 106.1 (344.0)<br>No: 459, 433.8 (935.8)         | 0.064                          | 0.471                                                                          | -318.75,<br>-1188.2 - 550.7  |
| Chronic kidney diseases                      | Yes: 6, 76.2 (7339.9)<br>No: 458, 434.8 (934.0)         | 0.123                          | 0.859                                                                          | -80.80,<br>-973.21 - 811.6   |
| Cancer                                       | Yes: 21, 271.5 (1133.1)<br>No: 443, 438.9 (930.6)       | 0.420                          | -                                                                              |                              |
| Insomnia/ psychiatric disorders              | Yes: 101, 198.7 (1153.0)<br>No: 363, 470.3 (886.6)      | <b>0.007</b>                   | 0.966                                                                          | -5.51,<br>-257.4 - 246.39    |
| Other                                        | Yes: 135, 173.7 (635.0)<br>No: 329, 532.4 (1004.2)      | <b>&lt;0.001</b>               | 0.567                                                                          | 69.84,<br>-170.03 - 309.72   |
| COVID-19 history                             | Yes: 50, 12800.5 (30393.1)<br>No: 414, 367.0 (718.1)    | <b>&lt;0.001</b>               | Patients with a history of COVID 19 were not included in multivariate analysis |                              |

**Abbreviations:** IQR, interquartile range. 95%CI, 95% confidence interval

An explanation of the nature of the clinical parameters (namely, the medical history of the enrolled participants) is presented in detail in Table 1. A multivariate analysis was performed for parameters with a significance  $p < 0.4$  in univariate analysis

**Table S2.** Intensity of anti-SARS-CoV-2 IgG responses on day 42 after the first dose of BNT162b2 vaccination

| Parameter                             | N, median IgG levels (mg/dL) (IQR)                       | <i>p</i> , univariate analysis | <i>p</i> , multivariate analysis                                               | Coefficient, 95% CI             |
|---------------------------------------|----------------------------------------------------------|--------------------------------|--------------------------------------------------------------------------------|---------------------------------|
| Sex (male)                            | Male:181, 8902 (16190)<br>Female:294, 9462, (11759)      | 0.789                          | -                                                                              |                                 |
| Age (years)                           | $\rho = -0.453$                                          | <b>&lt;0.001</b>               | <b>&lt;0.001</b>                                                               | -170.13,<br>-232.77 - -107.48   |
| Hypertension                          | Yes: 136, 4805.2, (9747.1)<br>No: 339, 10654.7 (12571)   | <b>&lt;0.001</b>               | 0.762                                                                          | -354.12,<br>-2646.49 - 1938.25  |
| Diabetes mellitus                     | Yes: 56, 5573.7 (8384.3)<br>No: 419, 9848.8 (13204.8)    | <b>0.003</b>                   | 0.653                                                                          | -645.63,<br>-3466.56 - 2175.31  |
| Dyslipidemia                          | Yes: 84, 5304.0 (8891.1)<br>No: 391, 10188.9 (13223.7)   | <b>&lt;0.001</b>               | 0.270                                                                          | -1274.16,<br>-3540.4 - 992.07   |
| Chronic heart disease                 | Yes: 61, 5575.5 (12637.1)<br>No: 414, 9463.0 (13161.9)   | <b>0.038</b>                   | 0.300                                                                          | -1453.18,<br>-4208.84 - 1302.48 |
| Stroke/TIA                            | Yes: 25, 4577.7 (8220.3)<br>No: 450, 9369.5 (13280.0)    | <b>0.015</b>                   | 0.413                                                                          | -1605.24,<br>-5456.78 - 2246.31 |
| Venous/arterial thrombosis            | Yes: 11, 10575.8 (33957.9)<br>No: 464, 9154.85 (13003.7) | 0.993                          | -                                                                              |                                 |
| Chronic respiratory disease           | Yes: 25, 4141.6 (19620.0)<br>No: 450, 9283.25 (12487.9)  | 0.383                          | 0.083                                                                          | 3271.63,<br>-427.97 - 6971.23   |
| Autoimmune/ autoinflammatory diseases | Yes: 38, 6282.8 (8611.5)<br>No: 437, 9354.4 (13618.6)    | 0.209                          | 0.113                                                                          | -2367.31,<br>-5294.91 - 560.3   |
| Thyroid disease                       | Yes: 57, 7843.5, (9832.8)<br>No: 418, 9342.95 (39999.8)  | 0.856                          | -                                                                              |                                 |
| Chronic liver diseases                | Yes: 5, 7209.8 (10583.8)<br>No: 470, 9283.25 (13083.9)   | 0.479                          | -                                                                              |                                 |
| Chronic kidney diseases               | Yes: 6, 6595.3 (21678.2)<br>No: 469, 9270.9 (12916.6)    | 0.717                          | -                                                                              |                                 |
| Cancer                                | Yes: 23, 9331.5 (32366.7)<br>No: 452, 9154.9 (12583.7)   | 0.939                          | -                                                                              |                                 |
| Insomnia/ psychiatric disorders       | Yes: 103, 5679.3 (12700.1)<br>No: 372, 9941.7 (12790.5)  | <b>0.005</b>                   | 0.578                                                                          | -659.49,<br>-2991.03 - 1672.05  |
| Other                                 | Yes: 135, 5258.7 (12114.1)<br>No: 340, 10442.3 (12340.0) | <b>&lt;0.001</b>               | 0.832                                                                          | -240.44,<br>-2464.5 - 1983.61   |
| COVID-19 history                      | Yes: 59, 22136.0 (30151.2)<br>No: 416, 7805.4 (11033.7)  | <b>&lt;0.001</b>               | Patients with a history of COVID 19 were not included in multivariate analysis |                                 |

**Abbreviations:** IQR, interquartile range; 95%CI, 95% confidence interval

An explanation of the nature of the clinical parameters (namely, the medical history of the enrolled participants) is presented in detail in Table 1. A multivariate analysis was performed for parameters with a significance  $p < 0.4$  in univariate analysis

**Table S3.** Intensity of anti-SARS-CoV-2 IgG responses on day 90 after the first dose of BNT162b2 vaccination

| Parameter                                    | N, median IgG levels (mg/dL) (IQR)                        | <i>p</i> , univariate analysis | <i>p</i> , multivariate analysis                                               | Coefficient, 95% CI            |
|----------------------------------------------|-----------------------------------------------------------|--------------------------------|--------------------------------------------------------------------------------|--------------------------------|
| Sex (male)                                   | Male:155, 2097.2 (4599.9)<br>Female: 252, 2198.4 (3092.4) | 0.937                          | -                                                                              |                                |
| Age (years)                                  | $\rho = -0.296$                                           | <b>&lt;0.001</b>               | <b>&lt;0.001</b>                                                               | -39.44,<br>-59.37 - -19.51     |
| Hypertension                                 | Yes: 124, 1543.1 (2944.5)<br>No: 283, 2483.2 (3548.1)     | <b>&lt;0.001</b>               | 0.857                                                                          | 67.2,<br>-666.48 - 800.87      |
| Diabetes mellitus                            | Yes: 60, 1183.2 (2499.0)<br>No: 347, 2271.7 (3467.8)      | <b>0.003</b>                   | 0.795                                                                          | -114.99,<br>-984.01 - 754.02   |
| Dyslipidemia                                 | Yes: 82, 1275.1 (2628.1)<br>No: 325, 2291.9 (3770.9)      | <b>&lt;0.001</b>               | 0.331                                                                          | -349.23,<br>-1054.53 - 356.07  |
| Chronic heart disease                        | Yes :62, 1601.5 (5020.8)<br>No: 345, 2181.9 (3285.1)      | 0.152                          | 0.783                                                                          | -125.71,<br>-1023.07 - 771.66  |
| Stroke/TIA                                   | Yes: 23, 1295.3 (1835.4)<br>No: 384, 2181.0 (3592.1)      | <b>0.016</b>                   | 0.349                                                                          | -566.14,<br>-1754.96 - 622.69  |
| Venous/arterial thrombosis                   | Yes: 7, 947.6 (3749.3)<br>No: 400, 2157.9 (3485.8)        | 0.162                          | 0.210                                                                          | 838.38,<br>-474.77 - 2151.53   |
| Chronic respiratory disease                  | Yes: 22, 2167.0 (6547.2)<br>No: 385, 2148.8 (3325.0)      | 0.956                          |                                                                                |                                |
| Autoimmune/ autoimmune-inflammatory diseases | Yes: 33, 1705.9 (1694.0)<br>No:374, 2201.7 (3622.5)       | 0.150                          | <b>0.029</b>                                                                   | -1076.75,<br>-2044.3 - -109.19 |
| Thyroid disease                              | Yes: 44, 2220.6 (3061.1)<br>No: 363, 2143.6 (3574.2)      | 0.689                          |                                                                                |                                |
| Chronic liver diseases                       | Yes: 4, 1335.3 (1241.0)<br>No:403, 2157.8 (3519.3)        | 0.324                          | 0.601                                                                          | -707.43,<br>-3366 - 1951.15    |
| Chronic kidney diseases                      | Yes: 7, 2254.5 (15541.3)<br>No: 400, 2148.8 (3419.2)      | 0.874                          | -                                                                              |                                |
| Cancer                                       | Yes: 18, 1838.7 (3386.1)<br>No: 389, 2157.8 (3477.3)      | 0.651                          | -                                                                              |                                |
| Insomnia/ psychiatric disorders              | Yes: 126, 1932.4 (5623.2)<br>No: 281, 2191.4 (2988.4)     | 0.290                          | 0.291                                                                          | -370.41,<br>-1059.56 - 318.74  |
| Other                                        | Yes: 140, 1533.7 (3511.0)<br>No: 267, 2345.4 (3488.2)     | <b>0.001</b>                   | 0.861                                                                          | 59.96,<br>-612.9 - 732.82      |
| COVID-19 history                             | Yes: 54, 9390.4 (26600.6)<br>No: 353, 1911.7 (2875.7)     | <b>&lt;0.001</b>               | Patients with a history of COVID 19 were not included in multivariate analysis |                                |

**Abbreviations:** IQR, interquartile range; 95%CI, 95% confidence interval

An explanation of the nature of the clinical parameters (namely, the medical history of the enrolled participants) is presented in detail in Table 1. A multivariate analysis was performed for parameters with a significance  $p < 0.4$  in univariate analysis

**Table S4.** Intensity of anti-SARS-CoV-2 IgG responses on day 90 after the first dose of BNT162b2 vaccination

| Parameter                             | N, median IgG levels (mg/dL) (IQR)                        | <i>p</i> , univariate analysis | <i>p</i> , multivariate analysis                                               | Coefficient, 95% CI          |
|---------------------------------------|-----------------------------------------------------------|--------------------------------|--------------------------------------------------------------------------------|------------------------------|
| Sex (male)                            | Male: 106, 536.8 (1231.9)<br>Female: 216, 727.6, (1011.9) | 0.179                          | 0.466                                                                          | 115.37,<br>-195.89 - 426.63  |
| Age (years)                           | $\rho = -0.009$                                           | <b>&lt;0.001</b>               | <b>0.004</b>                                                                   | -16.04,<br>-26.91 - -5.17    |
| Hypertension                          | Yes: 77, 303.3 (606.3)<br>No: 245, 796.0 (1232.3)         | <b>&lt;0.001</b>               | 0.987                                                                          | 3.52,<br>-411.24 - 418.28    |
| Diabetes mellitus                     | Yes: 41, 308.8 (711.4)<br>No: 281, 745.9 (1141.1)         | <b>0.002</b>                   | 0.624                                                                          | -132.57,<br>-665.31 - 400.16 |
| Dyslipidemia                          | Yes: 61, 329.7 (675.8)<br>No: 261, 771.1 (1217.9)         | <b>&lt;0.001</b>               | 0.606                                                                          | -106.25,<br>-511.25 - 298.74 |
| Chronic heart disease                 | Yes: 43, 485.5 (956.8)<br>No: 279, 686.7 (1135.5)         | 0.063                          | 0.687                                                                          | -101.82,<br>-599.23 - 395.58 |
| Stroke/TIA                            | Yes: 16, 274.7 (361.1)<br>No: 306, 713.0 (1102.9)         | <b>0.006</b>                   | 0.854                                                                          | -68.38,<br>-801.23 - 664.46  |
| Venous/arterial thrombosis            | Yes: 3, 796.0 (-)<br>No: 319, 666.0 (1093.8)              | 0.903                          | -                                                                              |                              |
| Chronic respiratory disease           | Yes: 18, 1077.7 (1627.0)<br>No: 304, 655.2 (1074.6)       | 0.924                          | -                                                                              |                              |
| Autoimmune/ autoinflammatory diseases | Yes: 21, 472.8 (951.3)<br>No: 301, 686.7 (1094.4)         | 0.299                          | 0.538                                                                          | 175.3,<br>-384.43 - 735.03   |
| Thyroid disease                       | Yes: 35, 711.3 (805.6)<br>No: 287, 660.8 (1110.2)         | 0.423                          | -                                                                              |                              |
| Chronic liver diseases                | Yes: 1<br>No: 321, 669.2 (1094.4)                         | 0.404                          | -                                                                              |                              |
| Chronic kidney diseases               | Yes: 5, 1155.1 (9168.3)<br>No: 317, 666.0 (1091.4)        | 0.419                          | -                                                                              |                              |
| Cancer                                | Yes: 13, 1448.6 (15083.8)<br>No: 309, 651.3 (1013.6)      | <b>0.035</b>                   | 0.965                                                                          | -26.9,<br>-1232.72 - 1178.92 |
| Insomnia/ psychiatric disorders       | Yes: 80, 391.8 (927.4)<br>No: 242, 769.6 (1112.8)         | <b>&lt;0.001</b>               | 0.849                                                                          | -39.44,<br>-446.38 - 367.49  |
| Other                                 | Yes: 94, 290.8 (783.9)<br>No: 228, 793.6 (1166.9)         | <b>&lt;0.001</b>               | 0.878                                                                          | -30.55,<br>-420.79 - 359.69  |
| COVID-19 history                      | Yes: 35, 4056.5 (15302.3)<br>No: 287, 598.8 (880.9)       | <b>&lt;0.001</b>               | Patients with a history of COVID 19 were not included in multivariate analysis |                              |

**Abbreviations:** IQR, interquartile range; 95%CI, 95% confidence interval

An explanation of the nature of the clinical parameters (namely, the medical history of the enrolled participants) is presented in detail in Table 1. A multivariate analysis was performed for parameters with a significance  $p < 0.4$  in univariate analysis

**Table S5.** Adverse side effects and intensity of IgG antibody responses on day 21

| Parameter                | N, median IgG levels (mg/dL) (IQR)                     | <i>p</i> , univariate analysis | <i>p</i> , multivariate analysis | Coefficient, 95% CI           |
|--------------------------|--------------------------------------------------------|--------------------------------|----------------------------------|-------------------------------|
| Sex (male/female)        | Male:178, 397.1 (1448.0)<br>Female: 286, 444.7 (840.6) | 0.525                          |                                  |                               |
| Age                      | $\rho = -0.453$                                        | <b>&lt; 0.001</b>              | <b>0.003</b>                     | -20.05,<br>-33.25 - -6.86     |
| Comorbidities (≤2 vs ≥3) | ≥3: 78, 157.6, (578.8)<br>No: 196, 670.8 (1074.0)      | <b>&lt; 0.001</b>              | 0.863                            | 18.36,<br>-191.43 - 228.15    |
| Local pain               | Yes: 134, 590.4 (973.1)<br>No: 228, 415.3 (888.5)      | <b>0.005</b>                   | 0.833                            | 33.25,<br>-277.91 - 344.4     |
| Fever                    | Yes: 11, 609.3 (2472.8)<br>No: 453, 416.5 (940.0)      | 0.144                          | 0.563                            | -255.08,<br>-1122.34 - 612.17 |
| Myalgias                 | Yes: 11, 1248.7 (1217.0)<br>No: 351, 467.9 (879.4)     | <b>0.038</b>                   | 0.193                            | 556.6,<br>-284.17 - 1397.37   |
| Fatigue                  | Yes: 19, 662.1 (918.1)<br>No: 343, 468.5 (901.2)       | 0.175                          | 0.607                            | -177.72,<br>-857.36 - 501.92  |
| Headache                 | Yes: 29, 470.3 (747.3)<br>No: 333, 477.7 (920.8)       | 0.979                          | -                                |                               |
| Flu-like symptoms        | Yes: 1<br>No: 361, 470.3 (900.8)                       | 0.746                          | -                                |                               |
| Others                   | Yes: 24, 687.3 (1252.0)<br>No: 338, 468.2 (887.9)      | 0.447                          | -                                |                               |

**Abbreviations:** IQR, interquartile range. 95%CI, 95% confidence interval. The comorbidities as presented in detail in Table 1, while the side effects are those emerged after the first dose.

\* Others (adverse side effects) are described in detail in Table 2

**Table S6.** Intensity of anti-SARS-CoV-2 IgA responses on day 21 after the first dose of BNT162b2 vaccination

| Parameter                             | N, median IgG levels (mg/dL) (IQR)               | <i>p</i> , univariate analysis | <i>p</i> , multivariate analysis                                               | Coefficient, 95% CI        |
|---------------------------------------|--------------------------------------------------|--------------------------------|--------------------------------------------------------------------------------|----------------------------|
| Sex                                   | Male: 153 12.1 (23.0)<br>Female: 241, 7.2 (11.0) | <b>&lt;0.001</b>               | <b>0.019</b>                                                                   | -2.53,<br>-4.65 - -0.42    |
| Age (years)                           | $\rho = -0.280$                                  | <b>&lt;0.001</b>               | <b>0.001</b>                                                                   | -0.131,<br>-0.207 - -0.056 |
| Hypertension                          | Yes: 112, 6.4, (17.7)<br>No: 282, 9.6, (14.0)    | <b>0.018</b>                   | 0.727                                                                          | -0.13,<br>-0.21 - -0.06    |
| Diabetes mellitus                     | Yes: 43, 4.6 (12.2)<br>No: 351, 9.5, (15.3)      | <b>0.011</b>                   | 0.139                                                                          | 0.50,<br>-2.33 - 3.34      |
| Dyslipidemia                          | Yes: 80, 5.3 (10.2)<br>No: 314, 9.9 (15.6)       | <b>0.004</b>                   | 0.977                                                                          | -2.64,<br>-6.14 - 0.86     |
| Chronic heart disease                 | Yes: 50, 5.8 (22.0)<br>No: 344, 8.8 (14.7)       | 0.265                          | 0.940                                                                          | -0.04,<br>-2.64 - 2.57     |
| Stroke/TIA                            | Yes: 21, 7.8 (18.8)<br>No: 373, 8.7 (15.2)       | 0.644                          | 0.974                                                                          | 0.13,<br>-3.29 - 3.55      |
| Venous/arterial thrombosis            | Yes: 6, 1.5 (35.2)<br>No: 388, 8.7, (15.3)       | 0.386                          | 0.385                                                                          | -2.15,<br>-7.01 - 2.71     |
| Chronic respiratory disease           | Yes: 18, 7.9 (13.3)<br>No: 376, 8.6 (15.4)       | 0.559                          | -                                                                              |                            |
| Autoimmune/ autoinflammatory diseases | Yes: 27, 6.6 (9.3)<br>No: 367, 9.0 (15.4)        | 0.064                          | <b>0.028</b>                                                                   | -4.32,<br>-8.16 - -0.47    |
| Thyroid disease                       | Yes: 45, 6.2 (16.6)<br>No: 349, 8.7 (15.3)       | 0.723                          |                                                                                |                            |
| Chronic liver disease                 | Yes: 3, 19.5 (-)<br>No: 391, 8.6 (15.3)          | 0.443                          | -                                                                              |                            |
| Chronic kidney diseases               | Yes: 5, 19.3 (19.7)<br>No: 389, 8.5 (15.1)       | 0.296                          | 0.208                                                                          | 6.26,<br>-3.49 - 16.02     |
| Cancer                                | Yes: 13, 7.1 (17.7)<br>No: 381, 8.6 (15.3)       | 0.820                          | -                                                                              |                            |
| Insomnia/ psychiatric disorders       | Yes: 99, 6.86 (25.5)<br>No: 295, 8.8, (13.2)     | 0.532                          | -                                                                              |                            |
| Other                                 | Yes: 127, 6.2 (18.5)<br>No: 267, 10.0 (13.9)     | <b>0.018</b>                   | 0.839                                                                          | 0.27,<br>-2.37 - 2.92      |
| COVID-19 history                      | Yes: 43, 36.6 (13.4)<br>No: 351, 7.8 (12.3)      | <b>&lt;0.001</b>               | Patients with a history of COVID 19 were not included in multivariate analysis |                            |

**Abbreviations:** IQR, interquartile range. 95%CI, 95% confidence interval

An explanation of the nature of the clinical parameters (namely, the medical history of the enrolled participants) is presented in detail in Table 1. A multivariate analysis was performed for parameters with a significance  $p < 0.4$  in univariate analysis
